# Supplementary material
Source: PubMed Central journal article supplement (PMC3657514)
Supplement: NIHMS457029-supplement-Supplemental_Data.pdf [file NIHMS457029-supplement-Supplemental_Data.pdf]

**Supplementary Table 1**

| Name           | Sequence                       |
|----------------|--------------------------------|
| Pst I VEGF F   | AAACTGCAGATGAACTTTCTGCTGTCTTGG |
| Spe I VEGF R   | AAACTAGTTCACCGCCTCGGCTTGT      |
| OCT4 F         | GGCGTTCTCTTTGGAAAGGTGTTC       |
| OCT4 R         | CTCGAACCACATCCTTCTCT           |
| AFP F          | TATCAGCCACTGCTGCAACT           |
| AFP R          | G TTCAGGCTTTTGCTTCACC          |
| Flk-1 F        | CACCTGGCACTCTCCACCTTC          |
| Flk-1 R        | GATTCATCCCACTACCGAAAG          |
| Ncam F         | GGAAGGGAACCAAGTGAACA           |
| Ncam R         | ACGGTGTGTCTGCTTGAACA           |
| MLC2v F        | CAGCAGGCTCCTCGAACTCT           |
| MLC2v R        | GTTTATTTGCGCACAGCCCT           |
| Nkx2.5 F       | AGCAACTTCGTGAACTTTG            |
| Nkx2.5 R       | CCGGTCCTAGTGTGGA               |
| $\beta$ -MHC F | ACCCCTACGATTATGCG              |
| $\beta$ -MHC R | GTGACGTA CTGTTGCC              |
| GAPDH F        | TTCACCACCATGGAGAAGGC           |
| GAPDH R        | GGCATGGACTGTGGTCATGA           |
